# Supplementary material for: Synthesis, Spectroscopic Properties and Redox Behavior Kinetics of Rare-Earth Bistetrakis-4-[3-(3,4-dicyanophenoxy)phenoxy]phthalocyaninato Metal Complexes with Er, Lu and Yb
Source: PubMed Central journal article supplement (PMC8068851; doi:10.3390/molecules26082181), 2021-04-10
Supplement: molecules-26-02181-s001.pdf [file molecules-26-02181-s001.pdf]

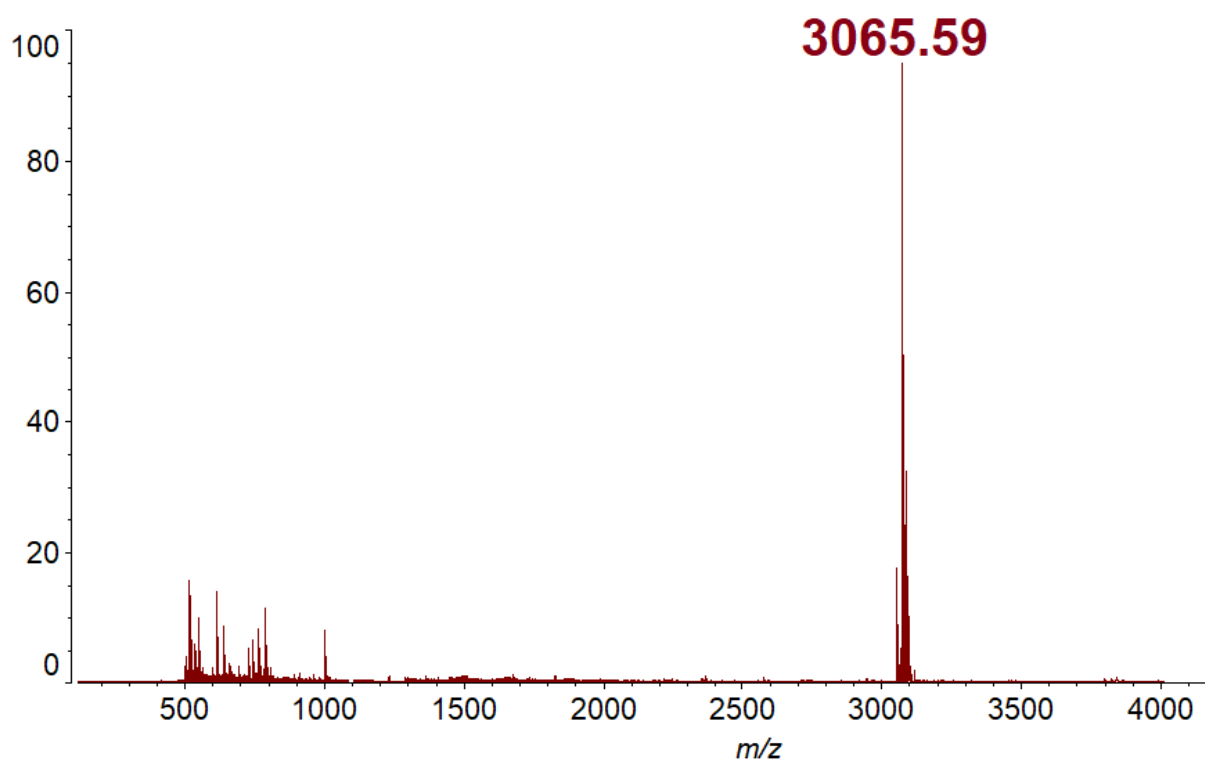

**Figure S1:** HR MALDI-TOF mass-spectrum of erbium (3) bis-tetrakis-4-[3-(3,4-dicyanophenoxy)phenoxy]phthalocyaninato (CHCA as matrix)

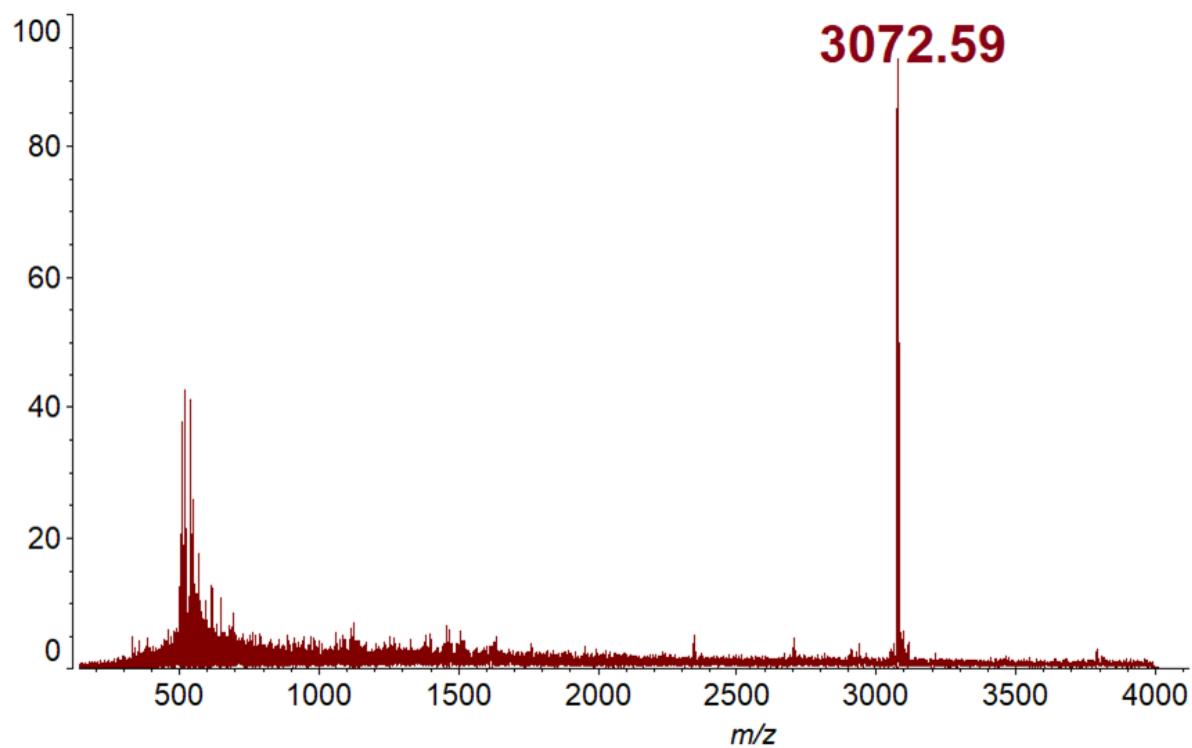

**Figure S2:** HR MALDI-TOF mass-spectrum of ytterbium (5) bis-tetrakis-4-[3-(3,4-dicyanophenoxy)phenoxy]phthalocyaninato (CHCA as matrix).

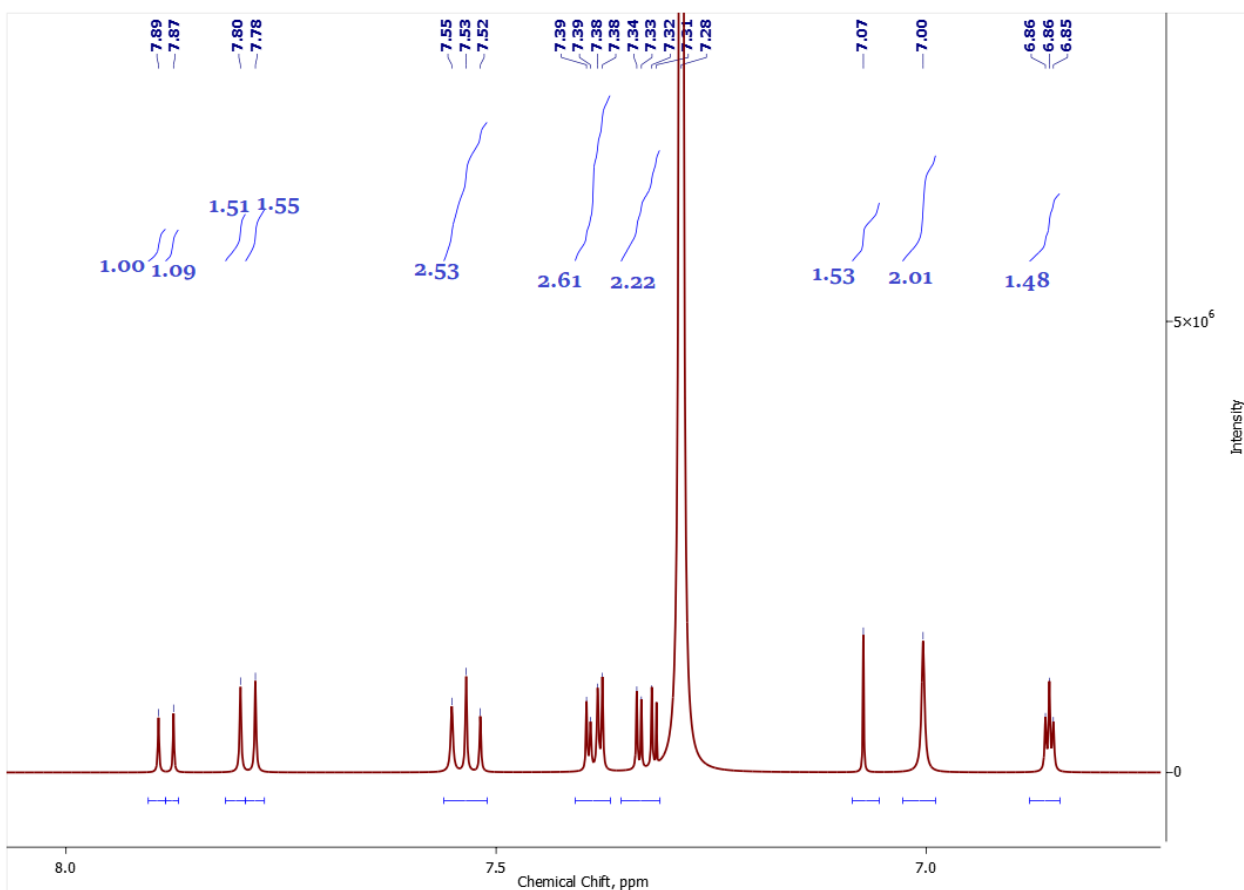

**Figure S3.**  $^1\text{H}$  NMR spectrum of lutetium (4) bis(tetrakis-4-[3-(3,4-dicyanophenoxy)phenoxy]phthalocyaninato) in  $\text{CDCl}_3$ ,

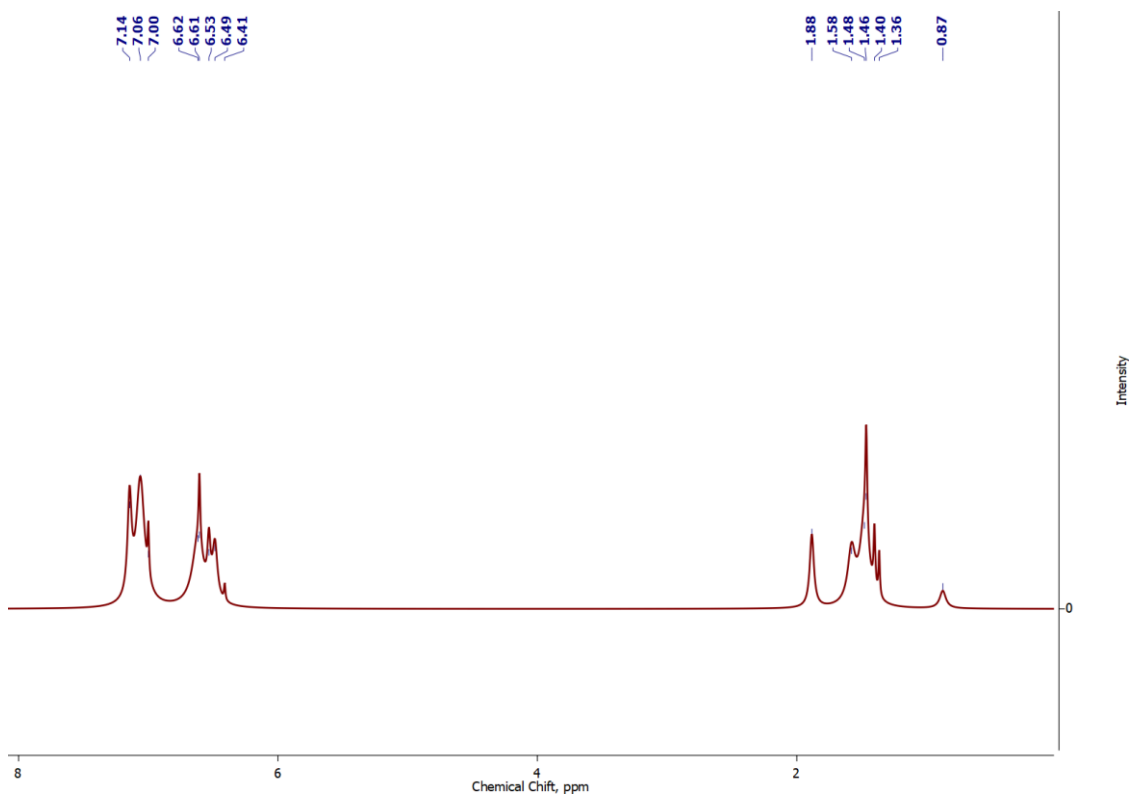

**Figure S4.**  $^1\text{H}$  NMR spectrum of ytterbium (5) bis(tetrakis-4-[3-(3,4-dicyanophenoxy)phenoxy]phthalocyaninato) in  $\text{CDCl}_3$ .
